# Supplementary material for: What influences the implementation of health checks in the prevention and early detection of chronic diseases among Aboriginal and Torres Strait Islander people in Australian primary health care? Findings from an Evidence Mapping Review
Source: Research Square preprint supplement (doi:10.21203/rs.3.rs-4746013/v1), 2024-08-15
Supplement: Supplementary file 1 [file c2f17f203efc3d9ac942ce0a.docx]

**Table 1.** Operational definitions of the key terminology used in this research work.

| Health checks | A health check is defined as the systematic and comprehensive assessment of an Individual’s physical, psychological and social well-being with an aim to identify undiagnosed conditions and risk factors in the PHC setting.  This aligns with a definition from the Medicare Benefits Schedule for MBS item 715 and the preamble of the Aboriginal and Torres Strait Islander Health Check templates developed by the National Aboriginal Community Controlled Health Organisation (NACCHO) and Royal Australian College of General Practitioners (RACGP). These checks included the use of standardised assessment tools, such as the Australian Diabetes Risk Assessment Tool or the Australian Cardiovascular Risk Assessment Calculator. Isolated screening programmes (i.e., blood pressure measurements or echocardiography screening for rheumatic heart disease are excluded, as those were not connected to the primary care setting (such as isolated school-based programmes, community health assessments or occupational assessments). |
| --- | --- |
| Chronic disease | Australian Institute of Health and Welfare reports 10 chronic condition groups (arthritis, mental health conditions, asthma, cancer, cardiovascular disease, chronic obstructive pulmonary disease, diabetes, chronic kidney disease, back pain and osteoporosis). Addition to these, our chronic disease also included conditions such as liver disease, chronic otitis media, and rheumatic heart disease that disproportionately affect Aboriginal and Torres Strait Islander people. |
| Mechanistic factors | Mechanistic factors are any specified intervention strategies rather than the logic of an intervention but are linked to the collaboration, participation, partnership, or service delivery management processes of/between subjects involved in the delivery of HCs at PHC level. |
| Contextual factors | Constellation of setting-related or external unique factors influencing health checks implementation at the PHC level |
| PHC delivery | In this context, Primary care is delivered by a range of providers, including Aboriginal Community Controlled Health Organisations, which are governed by a local board, Aboriginal Medical Services run by State and Territory governments, and private primary care services (sometimes referred to as ‘mainstream’ providers). |
| Enablers | Enablers are any external or internal factors that promote/facilitate or enable the uptake of health checks across PHC contexts, as recognised by consumers or other stakeholders with provided theoretical explanations. |
| Barriers | Barriers are any internal or external factors that impede the delivery or uptake of health checks across PHC contexts identified by consumers or other stakeholders under consideration. |

**Table 2.** Inclusion and exclusion criteria

| Inclusion criteria | Relevant studies (no restriction on study design) will be those that. |
| --- | --- |
|  | - Reports the uptake or implementation of health checks at PHC settings. - Reports the barriers and enablers for implementation of health checks. - Reports activities and initiatives started by practitioners or health care workers to improve utilization of health checks. - Relates to perspectives of practitioners, people, or managers with regard to opportunities and challenges in the implementation of health checks. - Relates to the description of people’s experience of interacting with practitioners or health care workers for health checks. - Describes the implementation of practices or practitioner-initiated initiatives to promote utilization of health checks. - Describes people-centered health outcomes about health checks implementation for early detection and prevention of chronic disease. - Describes opportunities created to engage people in utilization (including follow-up and referrals) of health checks. - Describes quality improvement, shared decision making, and relationships with practitioners/healthcare workers with regard to health checks. |
| Exclusion | - Studies that focused solely on chronic disease management. - Studies focused on describing patients, health care providers, and managers experience with chronic disease management rather than implementing health checks. - Studies that do not report strategies and initiatives targeted toward health checks implementation. - Studies that are not focused on primary health care settings. |
