# Supplementary material for: What influences the implementation of health checks in the prevention and early detection of chronic diseases among Aboriginal and Torres Strait Islander people in Australian primary health care? Findings from an Evidence Mapping Review
Source: Research Square preprint supplement (doi:10.21203/rs.3.rs-4746013/v1), 2024-08-15
Supplement: Supplementary file 2 [file f5707a9ef20ade19c371fc39.docx]

| **Recommendations to improve health checks quality and effectiveness** | **How can it be achieved?** | POLICY RECOMMENDATIONS | | PRACTICE RECOMMENDATIONS |
| --- | --- | --- | --- | --- |
| Funding priorities | Specific policy recommendations |
| 1. **Ensure HCs Content is evidence based and culturally safe** | | | | |
| 1. Maintain support to review components and content of HCs. | 1. Continue to support expert groups through national processes led by NACCHO and RACGP to provide guidance about delivering high-quality health checks[63]. Additionally support local adaptation of HC templates to local community needs through working with communities to receive and apply feedback on templates. | • | • | • |
| 1. **Facilitate optimal HC integration into workflow and clinical records** | | | | |
| 1. Incorporate novel functionalities into the platform where the HCs template is embedded | 1. Progress integration of chronic disease risk calculators into clinical software in conjunction with software developers, peak bodies, and clinical services 2. Practice recall and reminder systems are used effectively to support follow-up of health needs identified in the health check |  | • | • |
| b. Maintain support for integration of digital HCs | 1. Support piloting and use of digital HCs (with space for local customization to ensure maximum impact), which PHC or GP providers can add to their local software in use for HC delivery [64]. |  | • | • |
| 1. Simplify MBS item Descriptor and Associated notes to support better evidence-based patient-centered care | 1. Continue to support the MBS Task Force group to review MBS rebates to recognize and remunerate flexible service (in terms of the flexibility of the person who delivers services) delivery for HCsas identified byNACCHO-RACGP National guide to a preventive health assessment for Aboriginal and Torres Strait Islander people[65]. | • |  |  |
| 1. **Esuring HCs are delivered within a robust primary care system** | | | | |
| 1. Create a welcoming and culturally safe care | 1. Enhance welcoming environments and waiting areas; potentially including healthy snacks, tea/coffee, Aboriginal and Torres Strait Islander flags, arts and crafts to build trust and facilitate engagement with PHC. | • |  | • |
| 1. Ensure cultural competency is a core element in staff recruitment, professional development review, and other education/training opportunities. |  | • | • |
| 1. Implement Patient Reported Experience Measures (PREMs) tool to measure patient experience and culturally safe care. |  | • | • |
| 1. Use of HC promotional materials such as posters and pamphlets in practice waiting/consultation rooms demonstrating Aboriginal and Torres Strait Islander people’s positive experience with HCs, HC benefits and the conditions that make it useful. |  |  | • |
| 1. Development of a shared decision-making tool | 1. Convene an expert group to develop a shared decision-making tool focusing assessment of holistic needs, patient priorities for a HC and plan for healthcare following a health check | • | • |  |
| 1. Strengthen workflow and workforce stability | 1. Maximise the benefits of digital reforms by supporting broadband connectivity especially in remote settings and IT human resources support |  |  | • |
| 1. Invest in the professional growth and capacity of A&TSIHP/Ws to deliver HCs[66]. | • |  | • |
| 1. Recognize and appropriately remunerate A&TSIHWsfor their contribution to improving the health outcomes of their communities in line with the National Aboriginal and Torres Strait Islander Health Workforce Strategic Framework and Implementation Plan 2021–2031.5 | • |  |  |
| 1. Implement recommendations of the Medicare task force in order to support multidisciplinary teams within the full scope of their practice. | • |  |  |
| 1. Ensure integration of primary care, social care, and care partnerships to an optimum level | 1. Clarify the roles of GPS, Nurses, and A&TSIHP/Wsinvolved in HC delivery |  | • | • |
| 1. Support referral pathways to various culturally safe clinical and non-clinical services including transport, housing, NDIS, employment, etc. | • |  | • |
| 1. Supporting PHNs, ACCHOs, and other stakeholders to provide visibility of nonclinical services. This will be supported by developing a directory of evidence-based information and links to available non-clinical services. | • |  | • |
| 1. Recognise the role of families, carers, and communities and ensure they are included in models of care delivery. | • |  | • |
| 1. Address health equity and disparities | 1. Provide flexible, needs-based, funding support to ACCHOs to support community-led innovative models of care for health checks delivery care.. | • |  | • |
| 1. Support or provide transport services for service users to attend primary care in settings where physical access is a barrier to care. |  | • | • |
| 1. Implement a reform to access and affordability of allied health services available for the Aboriginal and Torres Strait Islander people. |  | • |  |
|  | 1. Ensure that HCs' remuneration under MBS supports access - to time with clinicians, etc. |  |  |  |
| 1. Adress time constraints | 1. Appointments are long enough to complete a comprehensive health check, including at least 15 minutes with the GP 2. Delinete the role of nursing staff or other allied health workforce in delivering HCs at mainstream services to address issues of consultation time. | • | • | • |
| 1. Support flexibility in consultation times (including extended opening hours and walk-in services wherever possible) and formats to foster genuine relationships between service providers and service users. |  | • | • |
| 1. **Workforce training to ensure the safe delivery of HCs** | | | | |
| 1. Promote standardized CPD-accredited Aboriginal and Torres Strait Islander culture awareness and safety training | 1. Promote subsidised standardised CPD-accredited Aboriginal and Torres Strait Islander culture awareness and safety training to GPs, general practice staff, primary health care staff, and other health care providers. | • | • | • |
| 1. Development of standardized MBS (715 and allied health referrals) training | 1. Involve NAATSIHWP, NACCHO, RACGP, and other key stakeholders to develop training material on MBS billing requirements, billing processes, and the role of all GPs, Nurses, and Aboriginal & Torres Strait Islander health workers providers in the delivery of high quality HCs. | • | • | • |
| 1. Develop a cross-cultural learning platform | 1. Support local collaborations for mainstream, AMS, and ACCHOS staff. This will allow healthcare providers to strengthen their knowledge and improve their HC delivery practices. | • | • | • |
| 1. **Community engagement and health promotion activities for HC delivery** | | | | |
| 1. Strengthen Indigenous clinical leadership | 1. Set up clear roles, responsibilities, and boundaries of senior managerial positions. |  |  | • |
| 1. Supporting formal system for responding to staff conflicts and needs |  |  | • |
| 1. Strengthen health promotion activities | 1. Resource ongoiong health promotionprogram for increasing quality HCs uptake by Aboriginal and Torres Strait Islander communities. | • |  |  |
| 1. Link health check initiative with locally available health promotion programs for chronic disease. | • | • | • |
| 1. Enable and strengthen the place-based partnership model | 1. Enabling local community ownership and control in the PHC service delivery system and social and cultural dynamics and norms. | • |  | • |
| 1. Ensure consumers, communities, service providers, and peak bodies are regularly engaged to identify the best practices and gaps to improve HC delivery effectively. |  |  | • |
| **6. Future Research on the implementation of HCs** | | | | |
|  | 1. Conduct high-quality research to understand the best practices for improving the delivery and follow-up care tracking of HCs at Aboriginal community-controlled health services, Aboriginal Medical Services, general practices and other primary care services. | • |  |  |
| 1. Co-develop and implement HCs delivery with a clear program theory and evaluation approach. | • |  |  |
| 1. Develop an evidence-based decision-making tool to drive the delivery of high-quality implementation of HCs. | • |  |  |
| 1. Identify place-based health promotion strategies for HCs delivery. | • |  |  |
| 1. Explore the benefits of providing aligned services such as housing, Centrelink, legal services, etc., at PHC locations so that patients can have needs relating to social determinants met. | • |  |  |
| 1. Conduct research on the implementation of HCs across a large number of communities to identify the aspects of contexts in which HCs are provided, that enable or impede their success. Key factors may include cultural safety, community relationships, trust, and engagement. | • |  |  |
